# Supplementary material for: Pathogenic LRRK2 variants are gain-of-function mutations that enhance LRRK2-mediated repression of β-catenin signaling
Source: Springer Nature journal article supplement (doi:10.1186/s13024-017-0153-4), 2017-01-19

Supplementary Figure 10

**Basal Canonical Wnt Activity - *Lrrk2* KO cells**

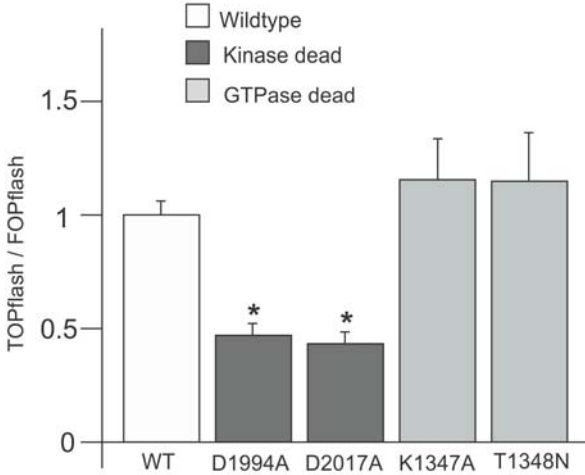

Supplement: MOESM1 [file 12008406]
